# Supplementary material
Source: bioRxiv or medRxiv preprint supplement (https://medrxiv.org/highwire/filestream/81562/field_highwire_adjunct_files/2/2020.05.15.20101097-3.pdf)
Supplement: Supplementary file [file 2020.05.15.20101097-3.pdf]

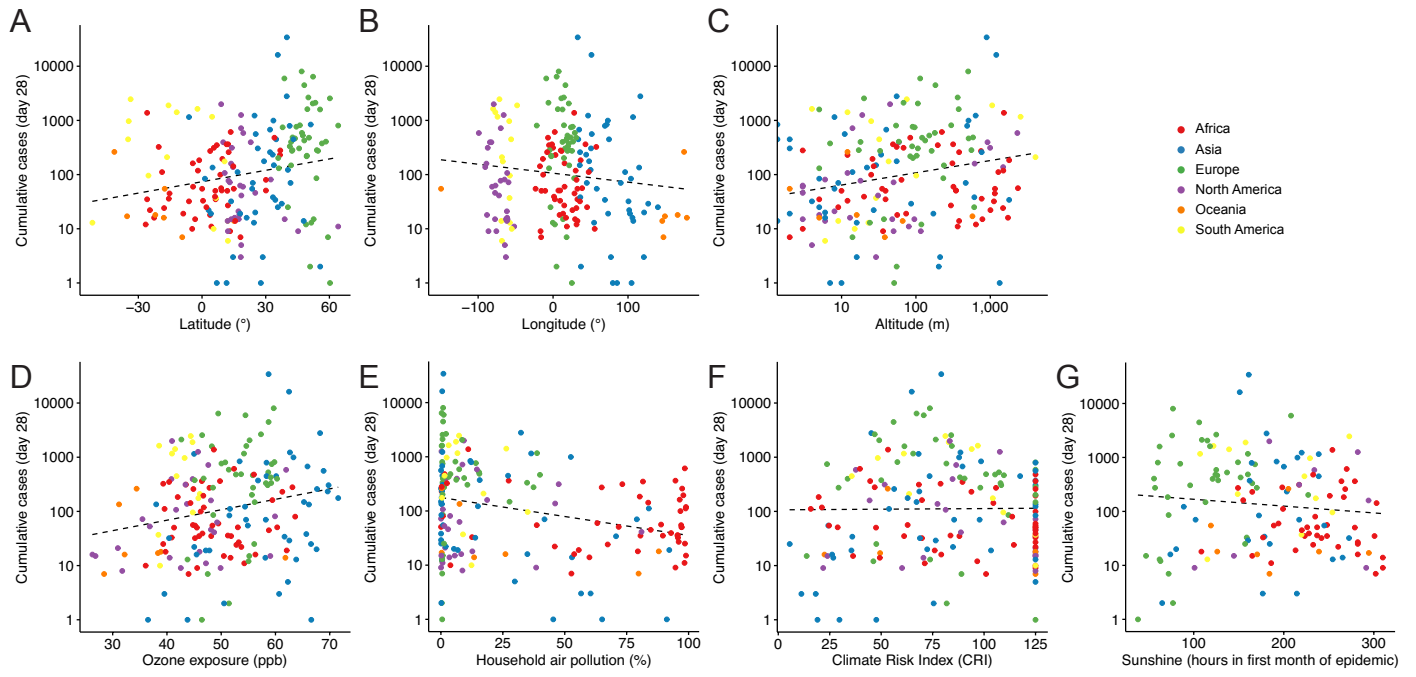

**Supplementary Figure 3. COVID-19 in relation to geographic and planetary factors.**

(A-G) Cumulative COVID-19 cases by country at 28 days since first reported case in relation to (A) latitude, (B) longitude, (C) altitude, (D) ozone exposure, (E) household air pollution, (F) Climate Risk Index (2018), and (G) hours of sunshine in the month of the first reported case. A regression line is fit using a linear model (dashed). Each country is colored by continent.
